# Supplementary material for: Einsatz partizipationsförderlicher Elemente in Bilderbuchbetrachtungen mit Krippenkindern und die Einstellungen pädagogischer Fachkräfte zur Partizipation
Source: Atypon-hosted journal article supplement (doi:10.1026/2191-9186/a000651), 2024-01-30
Supplement: 2191-9186_a000651_esm1.pdf [file 2191-9186_a000651_esm1.pdf]

## Elektronische Supplemente (ESM 1)

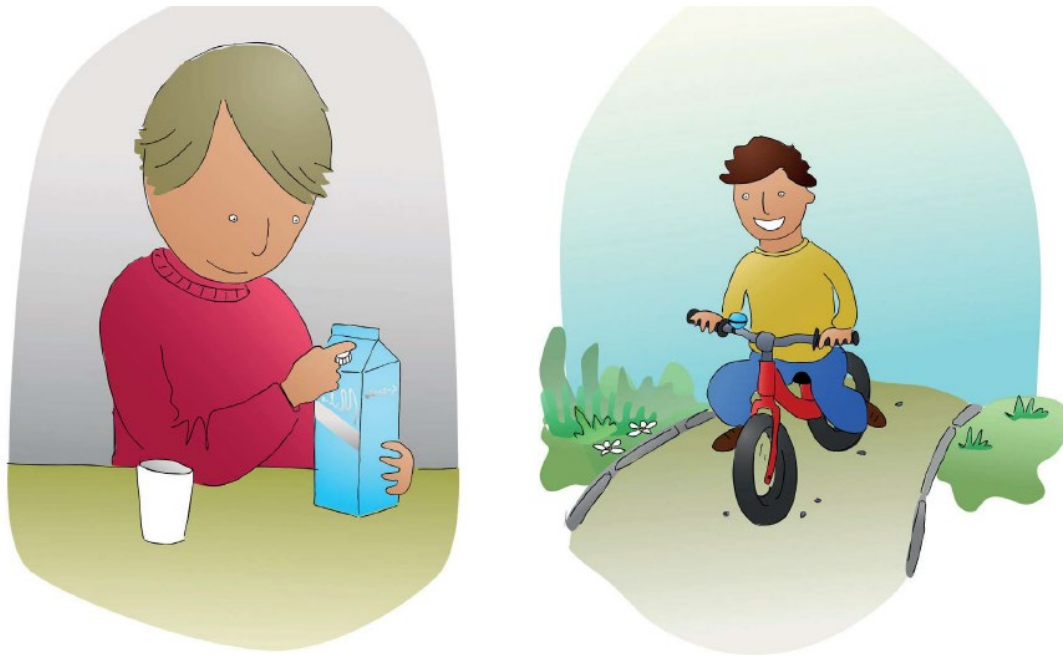

**Abbildung E1.** Beispielbilder aus dem Bilderbuch: (1) Kind öffnet eine Milchpackung (mentaler Zustand: Intention); (2) Kind auf dem Laufrad (mentaler Zustand: Emotion) Zeichnung: Ramiro Glauer, Nutzungsrechte: BIKA-Projekt.
